# Supplementary material for: Anion-exchange synthesis of thermoelectric layered SnS0.1Se0.9−xTex nano/microstructures in aqueous solution: complexity and carrier concentration
Source: Royal Society of Chemistry journal article supplement (doi:10.1039/c9tc01994d), 2019-01-01
Supplement: c9tc01994d1.pdf [file c9tc01994d1.pdf]

# **Anion-exchange Synthesis of Thermoelectric Layered $\text{SnS}_{0.1}\text{Se}_{0.9-x}\text{Te}_x$ Nano/microstructures in Aqueous Solution; Complexity and Carrier Concentration.<sup>†</sup>; Supporting Information.**

Lisi Huang,<sup>a</sup> Guang Han,<sup>\*a,b</sup> Bin Zhang,<sup>c</sup> and Duncan H. Gregory<sup>\*d</sup>

<sup>a</sup>College of Materials Science and Engineering, Chongqing University, Chongqing 400044, China

<sup>b</sup>Key Laboratory of Low-grade Energy Utilization Technologies and Systems, Ministry of Education of China, Chongqing University, Chongqing 400044, China

<sup>c</sup>Analytical and Testing Centre, Chongqing University, Chongqing 401331, China

<sup>d</sup>WestCHEM, School of Chemistry, University of Glasgow, Glasgow, G12 8QQ, UK

\*Corresponding author: Email: [guang.han@cqu.edu.cn](mailto:guang.han@cqu.edu.cn); [Duncan.Gregory@glasgow.ac.uk](mailto:Duncan.Gregory@glasgow.ac.uk)

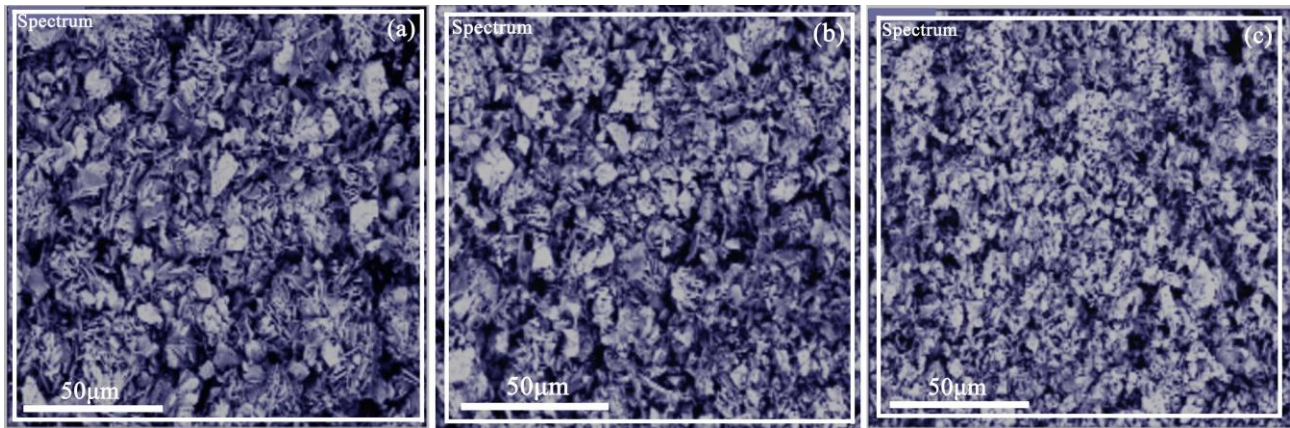

**Figure S1.** SEM images of  $\text{SnS}_{0.1}\text{Se}_{0.9-x}\text{Te}_x$  nano/microstructures revealing the positions where EDS spectra in Figure 2g-i were collected: (a)  $x = 0.02$ , (b)  $x = 0.05$ , and (c)  $x = 0.08$ .

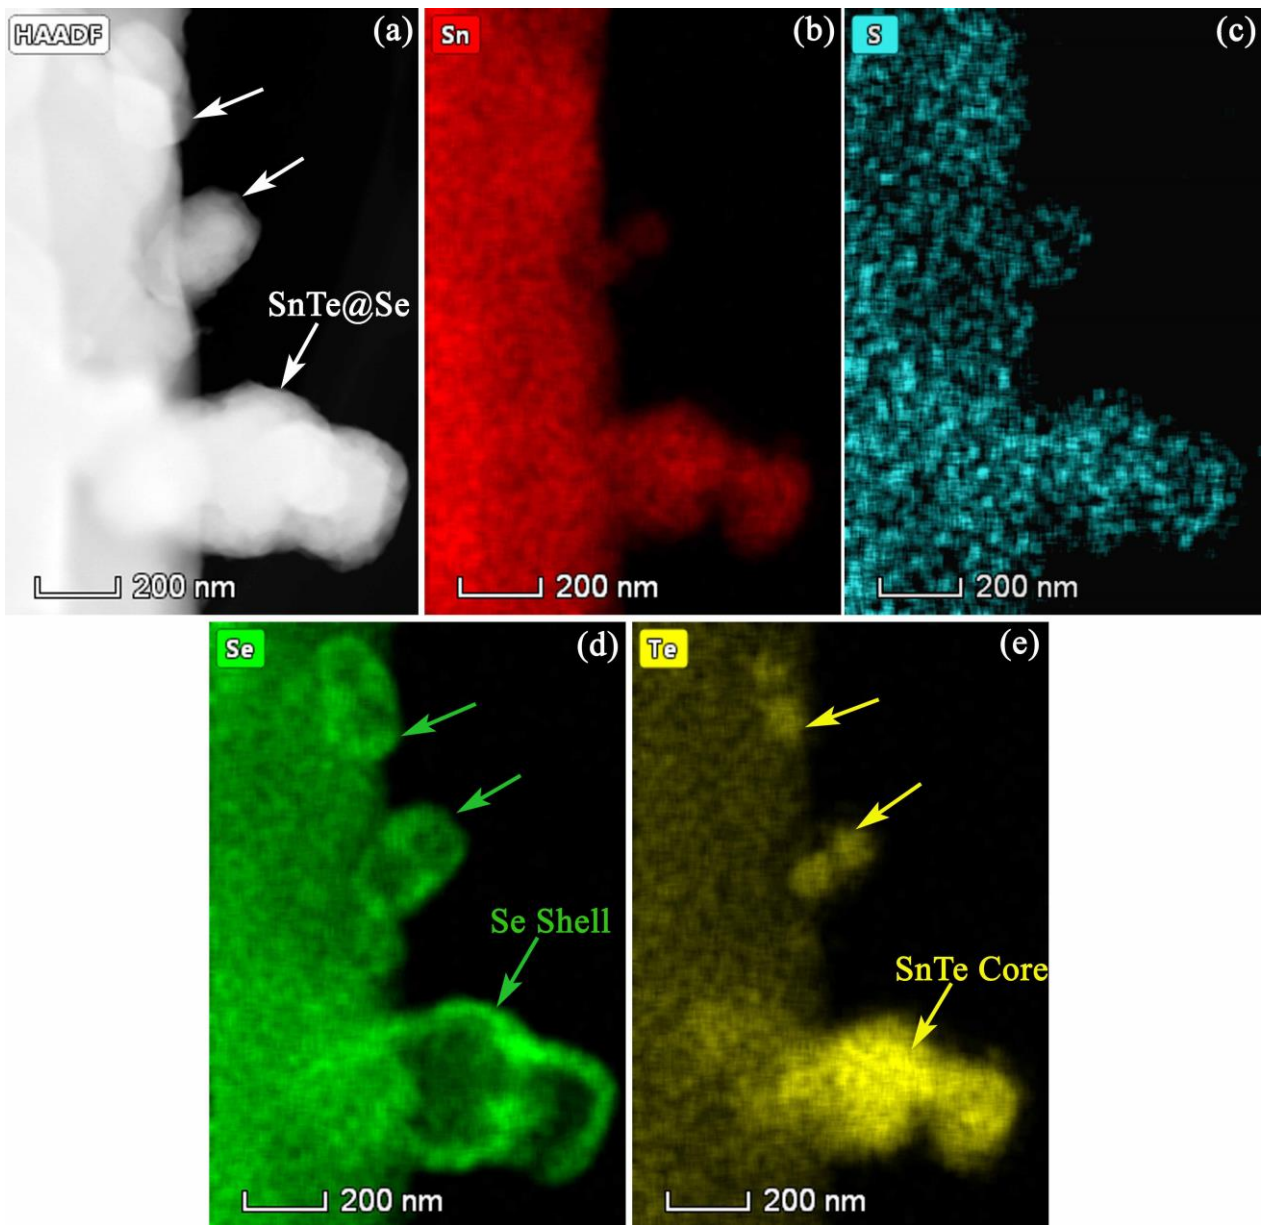

**Figure S2.** Characterization of  $\text{SnS}_{0.1}\text{Se}_{0.82}\text{Te}_{0.08}$  nano/microstructures: (a) HAADF-STEM image and (b-e) its corresponding element maps for Sn, S, Se and Te, respectively.

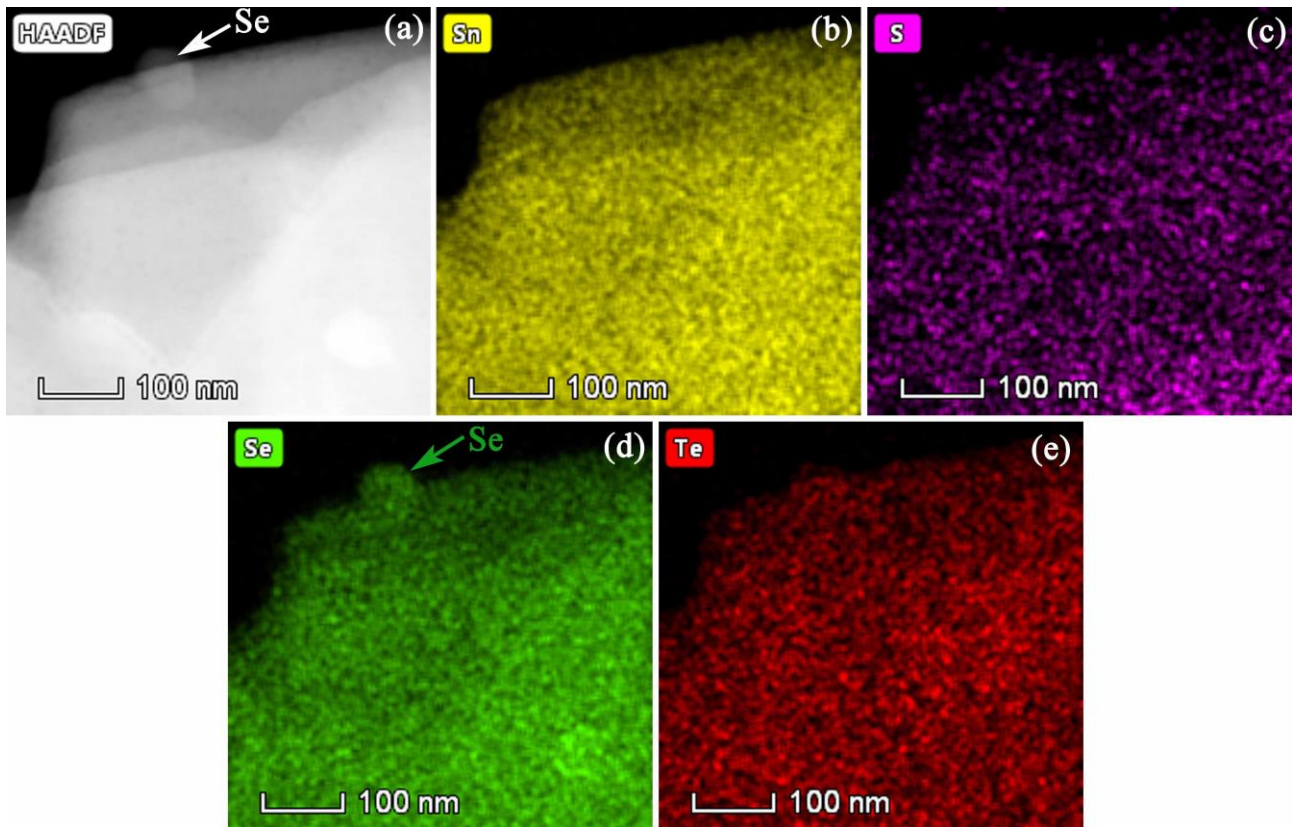

**Figure S3.** Characterization of  $\text{SnS}_{0.1}\text{Se}_{0.82}\text{Te}_{0.08}$  nano/microstructures: (a) HAADF-STEM image and (b-e) its corresponding element maps for Sn, S, Se and Te, respectively.

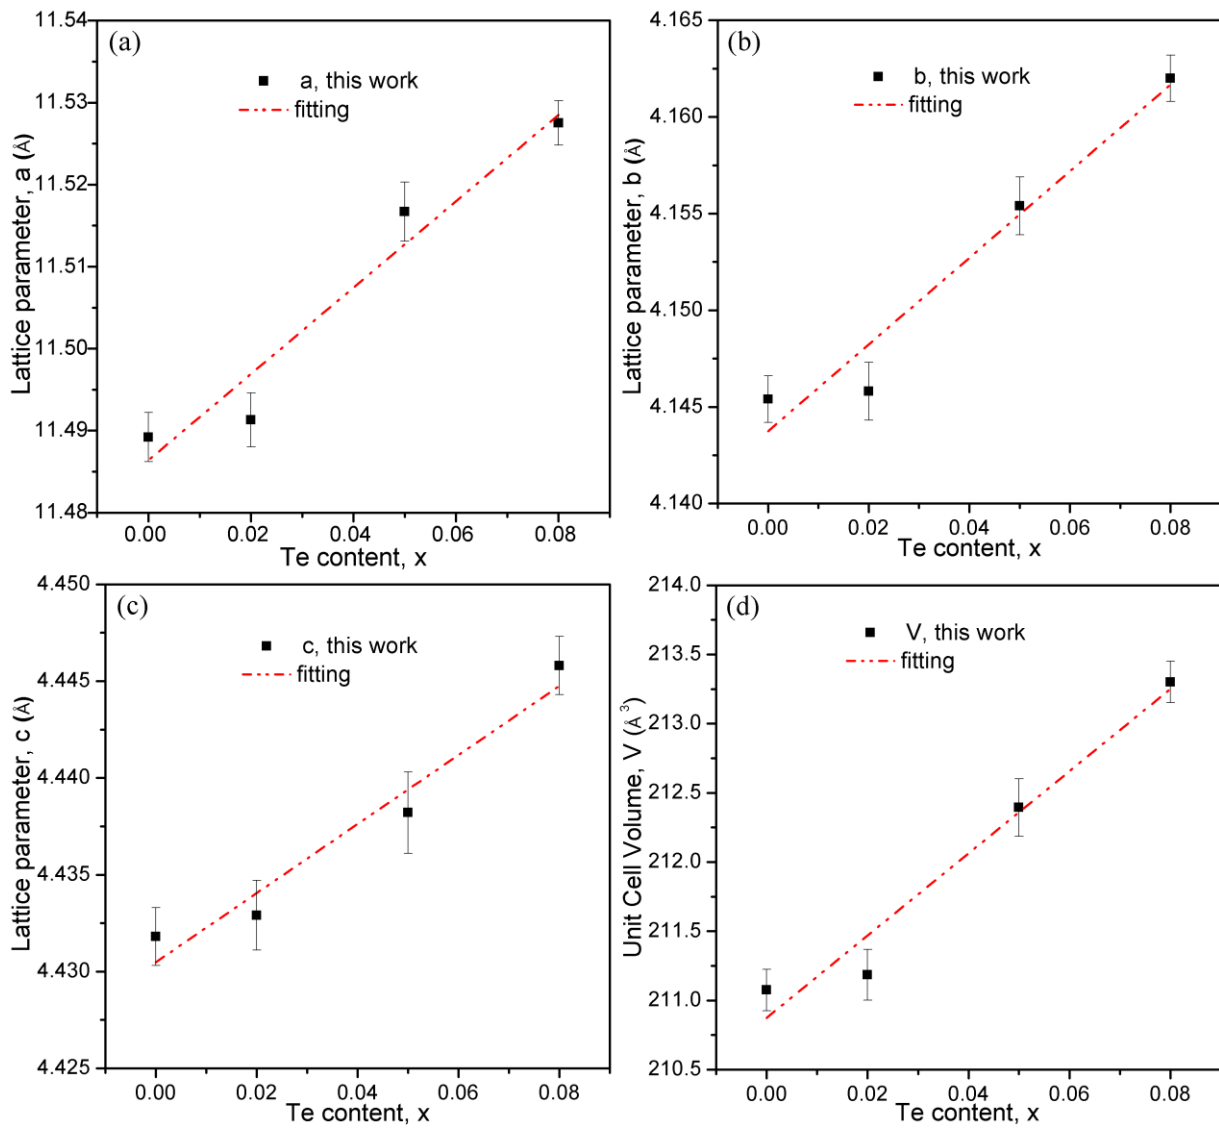

**Figure S4.** (a-c) Rietveld-refined lattice parameters and (d) unit cell volumes as a function of Te concentration (x) for SPS-SnS<sub>0.1</sub>Se<sub>0.9-x</sub>Te<sub>x</sub> (x = 0.02, 0.05, 0.08). The linear fits to each set of data are indicated by the red dashed/dotted line.

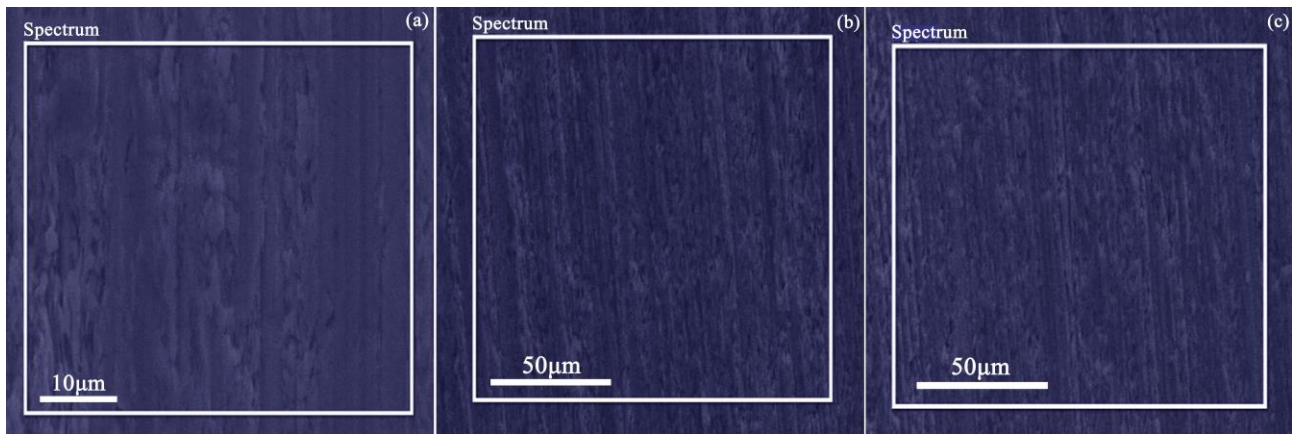

**Figure S5.** SEM images of  $\text{SnS}_{0.1}\text{Se}_{0.9-x}\text{Te}_x$  pellets revealing the positions where EDS spectra in Figure 5g-i were collected: (a)  $x = 0.02$ , (b)  $x = 0.05$ , and (c)  $x = 0.08$ .



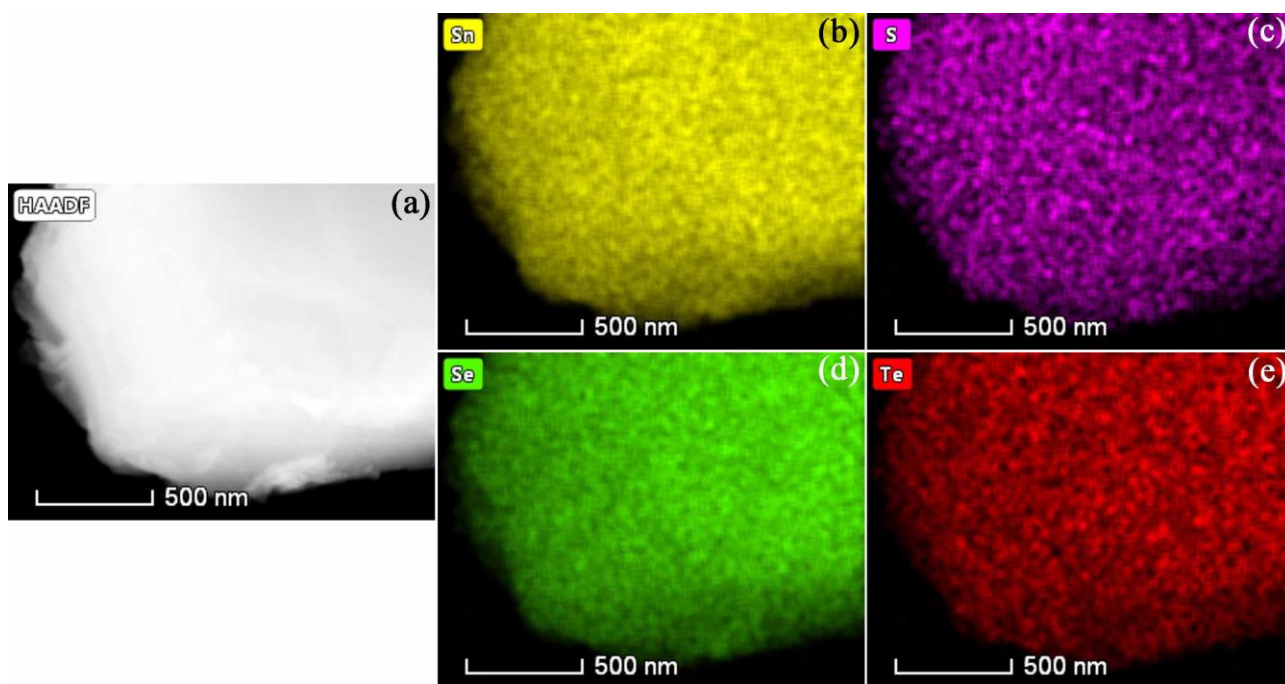

**Figure S6.** Characterization of SPS-SnS<sub>0.1</sub>Se<sub>0.88</sub>Te<sub>0.02</sub>: (a) HAADF-STEM image and (b-e) its corresponding element maps for Sn, S, Se and Te, respectively.

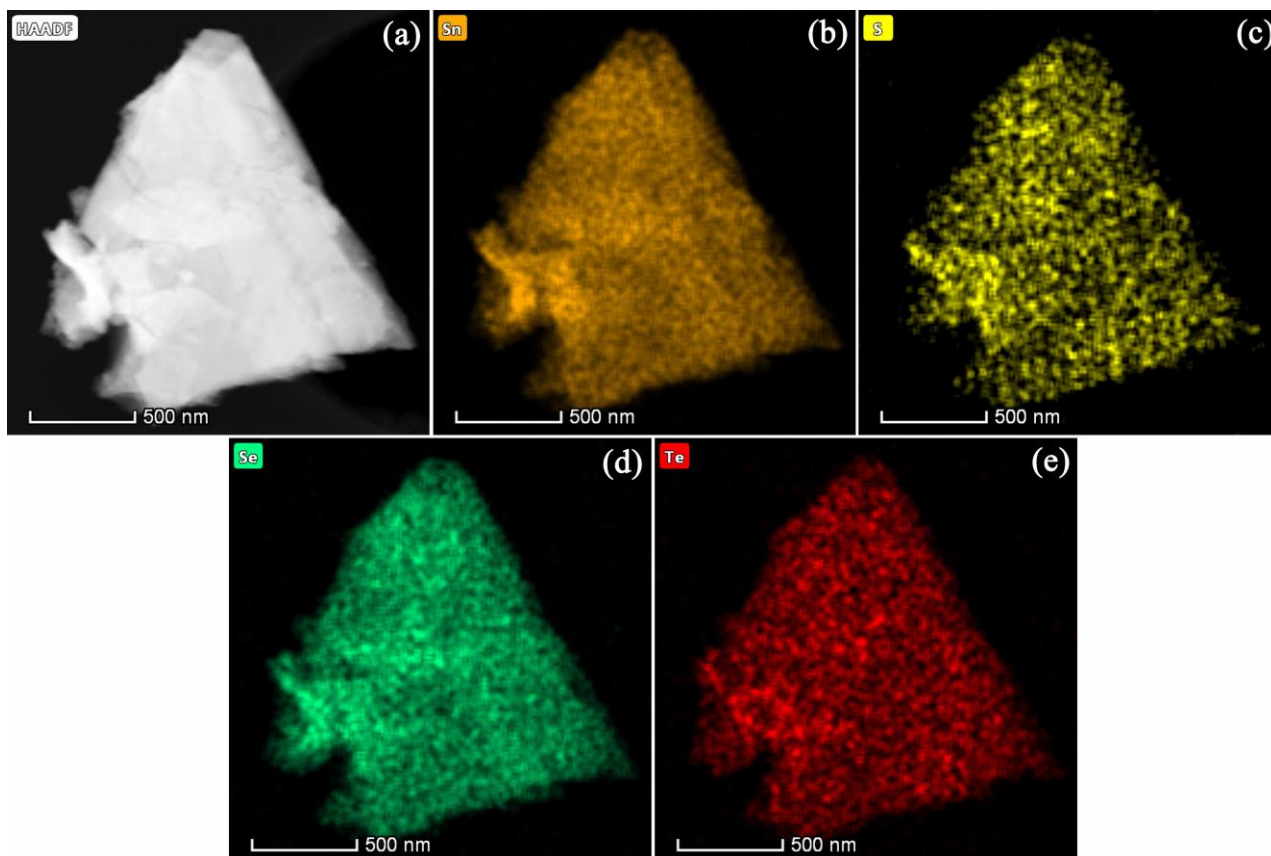

**Figure S7.** Characterization of SPS-SnS<sub>0.1</sub>Se<sub>0.82</sub>Te<sub>0.08</sub> (peeled plate 1): (a) HAADF-STEM image and (b-e) its corresponding element maps for Sn, S, Se and Te, respectively.



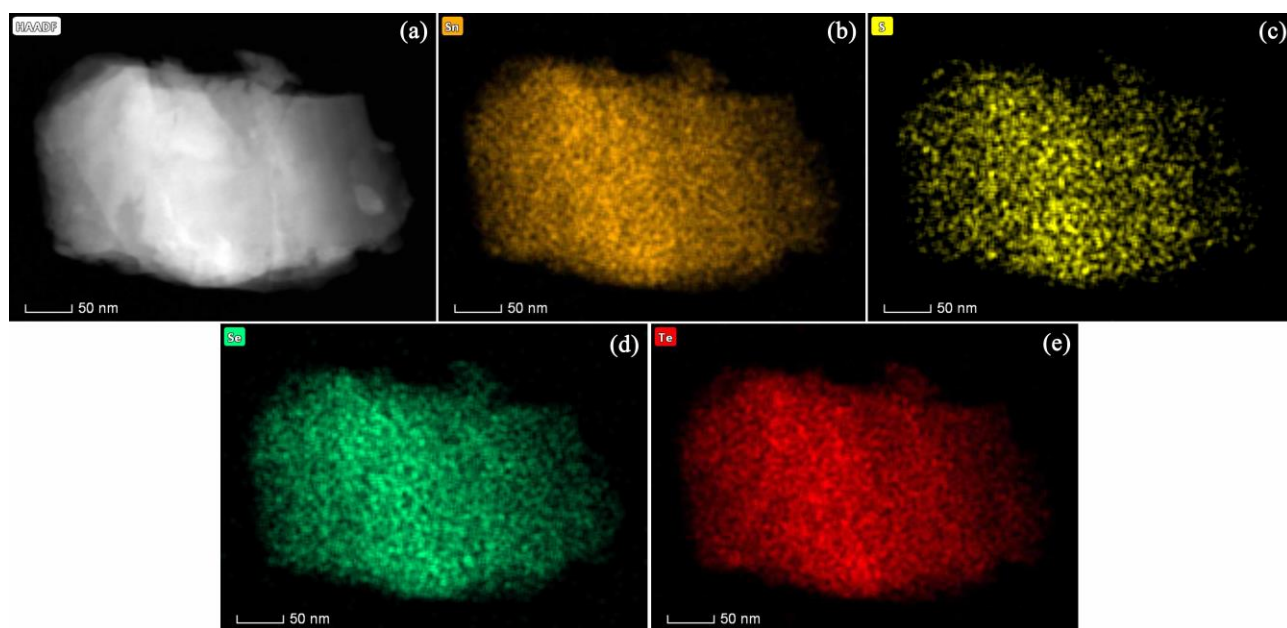

**Figure S8.** Characterization of SPS-SnS<sub>0.1</sub>Se<sub>0.82</sub>Te<sub>0.08</sub> (peeled plate 2): (a) HAADF-STEM image and (b-e) its corresponding element maps for Sn, S, Se and Te, respectively.
